## Anemia in Pregnant Women as a Cultural Phenomenon: A Literature Review

Christine Aden<sup>1</sup>, Moses Glorino Rumambo Pandin<sup>2</sup>

<sup>1</sup>Doctoral Program Student from The Faculty of Nursing, Universitas Airlangga, Jalan Dr. Ir. H. Soekarno, Mulyorejo, Kec. Mulyorejo, Surabaya, East Java 60115 2

<sup>2</sup>Faculty of Humanities Universitas Airlangga, Jalan Dr. Ir. H. Soekarno, Mulyorejo, Kec. Mulyorejo, Surabaya, East Java 60115

Corresponding author: [christine.aden-2023@fkip.unair.ac.id](mailto:christine.aden-2023@fkip.unair.ac.id)

### Abstract

**Background.** Explores how restrictions on food intake during pregnancy, due to cultural taboos, can lead to anemia. The study aims to provide an overview of prohibited food types, the supportive environment, the impact on pregnancy, and interventions that can be implemented to overcome anemia.

**Method.** The authors conducted a literature review by searching for articles on five databases, namely Science Direct, Springer Link, Pubmed, Sage, and Scopus. They also searched for suitable articles from other references, mainly journal articles published in the last five years (2019-2023).

**Results.** In total, there were 20 reviewed explaining the types of food prohibited during pregnancy and the reasons for this as well as support from family, religious figures, mothers, and in-laws. Overcoming anemia in pregnant women with a cultural approach resulted in meaningful results, with the intervention carried out for around three months. The use of picture books that are appropriate to the cultural context and local wisdom increases information about the importance of iron for pregnant women, increases the frequency of eating, the number of iron tablet intakes, the amount of food intake containing iron each day, and increases the baby's birth weight.

**Conclusion.** Anemia caused by cultural taboos on certain foods during pregnancy can be prevented and treated with local wisdom intervention approaches.

**Keywords** Anemia, Pregnant women, Culture

### BACKGROUND

Anemia in pregnancy is a major nutritional problem in the world. Anemia is experienced by 37% (37 million) pregnant women (WHO, 2023) and around 20% of maternal deaths in the world are caused by anemia. Teshome et al., 2020 state

that anemia is a determinant of low

body weight, premature birth, and infant death. As per the 2020 global nutrition report, 194 countries have agreed to reduce cases of anemia by 50% among women of childbearing age by 2025 (Muthuraj et al., 2023).

Every pregnant woman needs good food intake for her health and that of the fetus during pregnancy.

(Asim et al., 2021). Socio-cultural

barriers often cause inadequate nutritional intake in pregnant women (Mohammed et al., 2019). Cultural beliefs, such as food taboos, refer to foods that pregnant women or communities avoid for cultural reasons (Anggraini et al., 2023). Restricting pregnant women from consuming food can cause anemia (Laisser et al., 2022). Inadequate nutritional intake during pregnancy due to taboo patterns can cause pregnant women to experience malnutrition (Anggraini et al., 2023).

Workneh et al (2022) stated that experts previously explained that family members and pregnant women already know the good varied diet and different food types to improve the health of the mother and fetus. However, access to nutritious food and cultural and religious perspectives regarding food intake can be obstacles (Dalaba et al., 2021). Restricted access to healthy eating patterns due to culture, religion, and hygiene can cause pregnant women to abstain from nutritious food (Romulandi et al., 2023). Additionally, providing unscientific and dangerous nutritional information to pregnant women can result in the

dismissal of counseling (Alehegn et al., 2021).

Families have inherited the experience of caring for pregnant women to care for pregnant women in the family (Darmawati et al., 2022). Fathers, mothers, in-laws, and traditional leaders teach pregnant women to obey existing cultural norms to protect them from various obstacles and dangers during pregnancy and childbirth (Maycondo et al., 2022). Half of pregnant women in India live with their mothers-in-law, and they make important decisions regarding the condition of their pregnancy under the guidance of their mother-in-law (Varghese et al., 2019).

The following literature study will review the cultural values that pregnant women adopt to abstain from certain foods, the impact of anemia that accompanies it, and the programs that can help overcome it. Previous literature studies did not explain the supportive environment that pregnant women need to follow food habits during their pregnancy. This research aims to explain the types of taboo foods that should be avoided and interventions that can be

implemented to overcome anemia by adapting to culture.

## Method

The guidelines for carrying out a literature review follow the Preferred Reporting Items for Systematic Review and Meta-Analysis (PRISMA). The article search strategy included using appropriate keywords such as "culture", "support", "anemia", and

"pregnancy", as well as searching articles through databases such as Science Direct, Springer Link, Pubmed, Sage, and Scopus. The journal articles selected for this study are from the last five years (2019-2023). The researchers also used the PRISMA flow diagram to obtain research articles that meet the requirements. The PRISMA flow diagram is shown below:

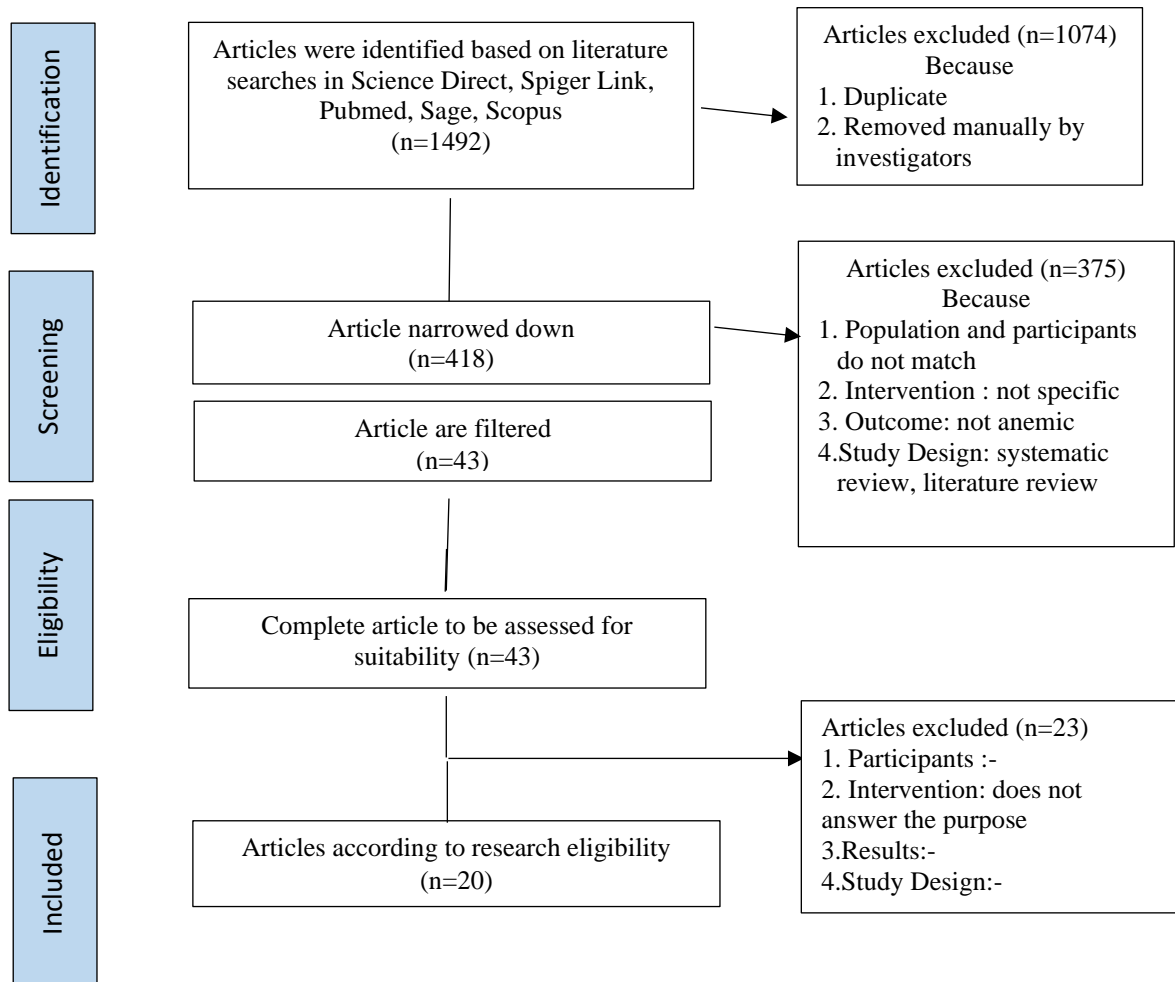

## Results

The author found 1492 articles from 5 databases Science Direct, Springer Link, Pubmed, Sage, and Scopus. After selecting for duplication via the Rayyan application and manually and based on PICO, namely population, intervention, comparison, and results, 20 articles were obtained that followed the research objectives. The results of articles showed that 6 articles explained the types of foods that are prohibited during pregnancy and the reasons. as well as the role of family, religious figures, mothers, and in-laws. The article was explained by Workneh et al (2023), Asim et al (2022); Amare et al (2022); Maykondo et al (2022); Dalaba et al (2021), Ramulondi et al (2021), and Alehegn et al (2019). Some articles examine the opinions of traditional leaders, mothers' perspectives, and husbands' perceptions of anemia which are explained by 2 articles by Darmawati et al (2020) and 1 article by Darmawati et al (2022). The relationship between anemia and various causal factors is reviewed in 5 articles by Rekha et al ( 2019); Mohammed et al (2019); Teshome et al (2020); Agbozo et al (2020); Muthuraj et al (2023). Detection of anemia and malnutrition and interventions to treat anemia are described in 4 articles by Angraini et al (2023), Citrakesumasari et al (2020), Nahrisah et al (2020), Papandreou et al (2023), and 1 article on the impact of anemia in pregnant women on babies born is explained by Sah et al (2022). The results of the article review can be seen in 1 below:

**Table 1 Characteristics of The Studies Reviewed**

| No. | Research Title,<br>Author, Year                                                                                   | Research Methods                                                                                                                                                                                                                                                                                  | Research Result                                                                                                                                                             |
|-----|-------------------------------------------------------------------------------------------------------------------|---------------------------------------------------------------------------------------------------------------------------------------------------------------------------------------------------------------------------------------------------------------------------------------------------|-----------------------------------------------------------------------------------------------------------------------------------------------------------------------------|
| 1.  | Dietary Perspectives and Practices during Pregnancy in Rural Amhara Region of Ethiopia<br>(Workneh et al., 2023)  | <b>Design:</b> Qualitative<br><b>Subject:</b> Pregnant women, family members, community figures<br><b>Variable:</b> Views on food variations for pregnant women<br><b>Instrument:</b><br>A list of questions in local languages, transcribed into English.<br><b>Analysis:</b> thematic analysis. | <b>Results:</b> Awareness of the importance of varied food and eating patterns for maternal and fetal health during pregnancy.                                              |
| 2.  | Improving Adherence to the Mediterranean Diet in Early Pregnancy Using a Clinical Decision Support System (CDSS): | <b>Design:</b> This study is a Randomized Controlled Clinical Trial.<br><b>Subjects:</b> Research involving 40 pregnant women<br><b>Variables:</b> This study will look at various variables such as medical history, biochemistry, anthropometric measurements, diet, and previously             | <b>Results:</b> The intervention group experienced a decrease in anxiety and depression (0.048) and experienced an increase in food portions in early pregnancy compared to |

| No. | Research Title, Author, Year                                                                                                                    | Research Methods                                                                                                                                                                                                                                                                                                                                                                                                                                                                                                                                                                                                                                                                                                           | Research Result                                                                                                                                                                                                                                                                                                                                                                                                                                                                                                             |
|-----|-------------------------------------------------------------------------------------------------------------------------------------------------|----------------------------------------------------------------------------------------------------------------------------------------------------------------------------------------------------------------------------------------------------------------------------------------------------------------------------------------------------------------------------------------------------------------------------------------------------------------------------------------------------------------------------------------------------------------------------------------------------------------------------------------------------------------------------------------------------------------------------|-----------------------------------------------------------------------------------------------------------------------------------------------------------------------------------------------------------------------------------------------------------------------------------------------------------------------------------------------------------------------------------------------------------------------------------------------------------------------------------------------------------------------------|
|     | (Papandreou et al, 2023)                                                                                                                        | applied psychological distress assessments.<br><b>Instruments:</b> Questionnaire<br><b>Analysis:</b> Shapiro–Wilk, Independent t-test, Chi-Square, and ANOVA.                                                                                                                                                                                                                                                                                                                                                                                                                                                                                                                                                              | the control group (p<0.01).                                                                                                                                                                                                                                                                                                                                                                                                                                                                                                 |
| 3.  | Sociocultural and drug-related factors associated with adherence to iron-folic acid supplementation among pregnant women (Muthuraj et al.,2023) | <b>Design:</b> Mixed methods, sequential exploratory design.<br><b>Subjects:</b> 236 pregnant women<br><b>Variables:</b><br>1).Sociodemographic (age, education, work, family type, religion, gestational age, ANC visit time, gravida, abortion history, delivery period, Hb level),<br>2).Compliance with folic-iron supplementation in pregnancy<br>3). Health Awareness and Counseling<br>4). Support from family members (husband, in-laws, mother)<br><b>Instrument:</b><br>Qualitative list of questions for FGD, listening to tape recordings, followed by quantitative survey with semi-structured questionnaires for pregnant women.<br><b>Analysis:</b><br>Logistic regression, Fisher and Chi-square analysis. | <b>Results:</b> The main themes that emerged in the FGD were 1) sociocultural factors (gender norms, communal guilt), 2) lack of awareness, and drug-related factors (hatred, misperceptions, and experienced side effects). Approximately 57% compliance with IFAT (iron-folic acid tablets). Side effects experienced when using IFAT (P=0.001, OR=2.33), misunderstandings about IFAT, such as weight gain when using IFAT (P=0.001, OR=2.86), large babies with the use of IFAT (P = 0.000, OR = 5.93) hurt compliance. |
| 4.  | Angraini Model as Effort to Early Detection of Chronic Energy Deficiency (CED) in Pregnancy (Angraini et al, 2023)                              | <b>Design:</b> Quantitative case-control design<br><b>Subjects:</b><br>190 pregnant women were divided into a control group of 95 people according to the inclusion criteria<br>are pregnant women with LILA <23.5, and do not suffer from chronic diseases.<br><b>Variables:</b><br>Socioeconomic, cultural (age, parity, food taboo), BMI, meal portions, weight gain, and chronic energy deficiency status<br><b>Instrument:</b><br>Questionnaire<br><b>Analysis:</b><br>Structural Equation Modeling (SEM) with Lisrel software                                                                                                                                                                                        | <b>Results:</b><br>Inadequate food intake causes chronic energy deficiency with abnormal laboratory values (anemia, protein, and iron) and poor weight gain                                                                                                                                                                                                                                                                                                                                                                 |
| 5.  | Husband’s Perception of Anemia among Pregnant Women Based on Cultural Perspective (Darmawati et al., 2022)                                      | <b>Design:</b> Qualitative<br><b>Subjects:</b> Twelve men who are already fathers.<br><b>Variables:</b> Knowledge about anemia in pregnant women and local wisdom<br><b>Instrument:</b><br>Open-ended questions with in-depth interviews (Interviews in the local language) and IDI guidelines (twelve in-depth interviews (IDIs))                                                                                                                                                                                                                                                                                                                                                                                         | <b>Results:</b> (1) Help given by husband during pregnancy (2) knowledge about anemia, help given when symptoms are felt (3) local wisdom believed by the community, and (4) health education based on local wisdom                                                                                                                                                                                                                                                                                                         |

| No. | Research Title,<br>Author, Year                                                                                                                                                 | Research Methods                                                                                                                                                                                                                                                                                                                                                                                                                                                                                                                                                     | Research Result                                                                                                                                                                                                                                                                                                                                                                                                    |
|-----|---------------------------------------------------------------------------------------------------------------------------------------------------------------------------------|----------------------------------------------------------------------------------------------------------------------------------------------------------------------------------------------------------------------------------------------------------------------------------------------------------------------------------------------------------------------------------------------------------------------------------------------------------------------------------------------------------------------------------------------------------------------|--------------------------------------------------------------------------------------------------------------------------------------------------------------------------------------------------------------------------------------------------------------------------------------------------------------------------------------------------------------------------------------------------------------------|
|     |                                                                                                                                                                                 | <b>Analysis:</b><br>Thematic analysis                                                                                                                                                                                                                                                                                                                                                                                                                                                                                                                                |                                                                                                                                                                                                                                                                                                                                                                                                                    |
| 6.  | What stops us from eating: a qualitative investigation of dietary barriers during pregnancy in Punjab, Pakistan (Asim et al., 2022)                                             | <b>Design:</b> Qualitative,<br><b>Subjects:</b> 29 mothers with children less than 2 years old, 12 health workers<br><b>Variables:</b> What factors influence food intake during pregnancy in rural areas<br><b>Instrument:</b> Structured list of questions<br><b>Analysis:</b> Thematically analyze transcripts to identify and categorize examples of stressors and benefit gains.                                                                                                                                                                                | <b>Results :</b><br>Obtained socio-ecological model<br>1). Physiological barriers (aversion to food, morning sickness, cravings). 2) Sociocultural barriers (food classification, fear of difficulties in giving birth, fear of abnormal blood pressure, and limited access for pregnant women to get a variety of foods. 3) Structural obstacles, namely inadequate antenatal check-ups, getting food is not easy |
| 7.  | Food taboos among pregnant women and associated factors in eastern Ethiopia (Amare et al., 2022)                                                                                | <b>Design:</b> Cross-sectional study<br><b>Subjects:</b> 422 pregnant women were randomly selected.<br><b>Variables:</b> Sociodemographics, dietary restrictions, reasons raised<br><b>Instrument:</b> home visit methods and direct interviews with participants.<br><b>Analysis:</b> analysis of relationships between variables                                                                                                                                                                                                                                   | <b>Results :</b><br>Some pregnant women abstain from certain foods due to taboos, which they may learn from friends or adhere to if they have a low education                                                                                                                                                                                                                                                      |
| 8.  | A qualitative study to explore dietary knowledge, beliefs, and practices among pregnant women in a rural health zone in the Democratic Republic of Congo (Maycondo et al, 2022) | <b>Design:</b> This research uses a qualitative approach<br><b>Subjects:</b> women at a gestational age of more than twelve weeks and key informants, health workers, fathers, and grandmothers.<br><b>Variables:</b> The topic of the interview was to explore participants' perceptions and behavior regarding nutritional needs during pregnancy<br><b>Instruments:</b> interviews during home visits with pregnant women, fathers, grandmothers, and key informants in the community<br><b>Analysis:</b> The method used is triangulation and thematic analysis. | <b>Results:</b> Good understanding of nutritional adequacy and diverse eating patterns during pregnancy, but low knowledge regarding nutritious foods and sources                                                                                                                                                                                                                                                  |
| 9.  | Culture and community perceptions on diet for maternal and child health: a qualitative study in rural northern                                                                  | <b>Design :</b> Qualitative.<br><b>Subject:</b> Community members, adult men, and women<br><b>Variables:</b>                                                                                                                                                                                                                                                                                                                                                                                                                                                         | <b>Results:</b><br>Participants agreed on the importance of an optimal diet. Perceptions of local wisdom regarding good and bad food                                                                                                                                                                                                                                                                               |



| No. | Research Title,<br>Author, Year                                                                                                                              | Research Methods                                                                                                                                                                                                                                                                                                          | Research Result                                                                                                                                                                                                                                                                                                                                                                                                                                                                                                                                                                                                                                                      |
|-----|--------------------------------------------------------------------------------------------------------------------------------------------------------------|---------------------------------------------------------------------------------------------------------------------------------------------------------------------------------------------------------------------------------------------------------------------------------------------------------------------------|----------------------------------------------------------------------------------------------------------------------------------------------------------------------------------------------------------------------------------------------------------------------------------------------------------------------------------------------------------------------------------------------------------------------------------------------------------------------------------------------------------------------------------------------------------------------------------------------------------------------------------------------------------------------|
|     | Ghana (Dalaba et al.,2021)                                                                                                                                   | Exploring people's perceptions of eating patterns and barriers to providing optimal eating patterns<br><b>Instrument:</b><br>Interviews in 10 groups<br><b>Analysis:</b> thematic analysis.                                                                                                                               | restrictions for pregnant women vary.<br>Limited food supplies and finances mean mothers cannot choose food and do not have a varied diet.                                                                                                                                                                                                                                                                                                                                                                                                                                                                                                                           |
| 10. | Traditional food taboos and practices during pregnancy, postpartum recovery, and infant care of Zulu women in northern KwaZulu-Nata (Ramulondi et al., 2021) | <b>Design:</b> A survey<br><b>Subject:</b><br>140 adult women who already h children and who have grandchild<br><b>Variables:</b> socio-demographic sociodemographics, Taboo nutrition for pregnant wor and the reasons<br><b>Instruments:</b><br>Structured questionnaire<br><b>Analysis:</b><br>Descriptive statistics. | <b>Results:</b><br>The practice of limiting food variety due to taboo during pregnancy and having no conflict regarding this was stated by more than half of the participants.<br><br>During pregnancy, certain foods are commonly avoided due to potential health risks. These include certain fruits like mango, naartjie, oranges, papaya, and peaches, as well as butternut, eggs, sweets (such as sugar, commercial juices, sweets, and honey), chili peppers, ice, and alcohol. On the other hand, there are also recommended foods that are beneficial for pregnant women. These include processed vegetables, most fruits (unless avoided), liver, and fish. |
| 11. | Exploring Indonesian mothers' perspectives on anemia during pregnancy (Darmawati et al., 2020)                                                               | <b>Design:</b> Qualitative<br><b>Subject:</b><br>: 24 pregnant women<br><b>Variables:</b><br><b>Instrument:</b> Structured list of questions<br><b>Analysis:</b> Thematic analysis                                                                                                                                        | <b>Results:</b><br>The following statement outlines the five common themes that are observed in the experiences of pregnant women with anemia:<br>(1) Anemia during pregnancy is often considered an unavoidable condition<br>(2) There is a lack of awareness regarding the clinical symptoms of anemia; (3) Traditional taboos surrounding anemia persist; (4) The husband and family                                                                                                                                                                                                                                                                              |

| No. | Research Title,<br>Author, Year                                                                                                                                                                                 | Research Methods                                                                                                                                                                                                                                                                                                                                                                                                                                                                                                                               | Research Result                                                                                                                                                                                                                                                                                                                                                                                         |
|-----|-----------------------------------------------------------------------------------------------------------------------------------------------------------------------------------------------------------------|------------------------------------------------------------------------------------------------------------------------------------------------------------------------------------------------------------------------------------------------------------------------------------------------------------------------------------------------------------------------------------------------------------------------------------------------------------------------------------------------------------------------------------------------|---------------------------------------------------------------------------------------------------------------------------------------------------------------------------------------------------------------------------------------------------------------------------------------------------------------------------------------------------------------------------------------------------------|
|     |                                                                                                                                                                                                                 |                                                                                                                                                                                                                                                                                                                                                                                                                                                                                                                                                | members play a crucial role in supporting anemia prevention. and (5) There is a need for health education that is culturally and religiously sensitive.                                                                                                                                                                                                                                                 |
| 12. | Determinants of Anemia Among Pregnant Women Attending Antenatal Care Clinic at Public Health Facilities in Kacha Birra District, Southern Ethiopia. (Teshome et al, 2020)                                       | <p><b>Design:</b> Case Control</p> <p><b>Subjects:</b> 344 pregnant women were assigned into two groups, namely the case and control groups.</p> <p><b>Variables:</b> 1) Sociodemographics of pregnant women 2) Characteristics of pregnant women / Obstetric history</p> <p><b>Instruments:</b> Questionnaires and interviews</p> <p>The Hb measuring instrument</p> <p>Stool samples, 24-hour diet recall, anthropometrics: measuring arm circumference</p> <p><b>Analysis:</b> Bivariate and multivariate analysis</p>                      | <p><b>Results :</b></p> <p>Living in a rural area and consuming taboo foods are significant predictors of anemia, according to multivariate test results [AOR= 3.92, CI: 95% 2.08–7.35]</p>                                                                                                                                                                                                             |
| 13. | Effect of Integrated Pictorial Handbook Education and Counseling on Improving Anemia Status, Knowledge, Food Intake, and Iron Tablet Compliance Among Anemic Pregnant Women in Indonesia. (Nahrisah et al,2020) | <p><b>Design:</b> Quasi-Experimental Study</p> <p><b>Subjects:</b> 140 pregnant</p> <p><b>Variables:</b> Socio-demographic values, nutritional and iron intake, newborn weight, perception about anemia.</p> <p><b>Instrument:</b> Before and after the intervention, participants were given demographic questionnaires, perception surveys, and nutritional assessments.</p> <p><b>Analysis:</b> Data analysis was carried out after the completion of the intervention at week 15.</p> <p>analysis with Chi-square, Mann-Whitney, ANOVA</p> | <p>This research develops an illustrated handbook adapted to several cultural and local contexts.</p> <p><b>Results:</b> after 15 weeks of intervention</p> <p>The nutritional values in the blood, namely hemoglobin and hematocrit, increased significantly in the intervention group.</p> <p>Likewise for knowledge, eating frequency scores, total IFA intake, and baby birth weight increased.</p> |
| 14. | Acehnese Cultural Leaders' Perspective on Anemia in Pregnant Women (Darmawati et al, 2020)                                                                                                                      | <p><b>Design:</b> Qualitative</p> <p><b>Subject:</b> 3 cultural figures selected from 9 traditional figures who have experience as traditional figures for more than 20 years.</p> <p><b>Variables:</b> Anemia, the role of cultural figures, and several regional poems serve as guidelines for regional mothers undergoing pregnancy and what to do to avoid anemia.</p> <p><b>Instrument:</b> in-depth interviews and focused discussions focused on Acehnese cultural figures.</p>                                                         | <p><b>Results:</b> Four points (1) local cultural beliefs about anemia; (2) local food ingredients; (3) husband's support so that pregnant women do not suffer from anemia; (4) what can and cannot be done.</p>                                                                                                                                                                                        |



| No.                                | Research Title,<br>Author, Year                                                                                                                                     | Research Methods                                                                                                                                                                                                                                                                                                                                                                                                                                                                                         | Research Result                                                                                                                                                                                                                                                                                                                                                                                                                                                |
|------------------------------------|---------------------------------------------------------------------------------------------------------------------------------------------------------------------|----------------------------------------------------------------------------------------------------------------------------------------------------------------------------------------------------------------------------------------------------------------------------------------------------------------------------------------------------------------------------------------------------------------------------------------------------------------------------------------------------------|----------------------------------------------------------------------------------------------------------------------------------------------------------------------------------------------------------------------------------------------------------------------------------------------------------------------------------------------------------------------------------------------------------------------------------------------------------------|
| <b>Analysis:</b> Thematic analysis |                                                                                                                                                                     |                                                                                                                                                                                                                                                                                                                                                                                                                                                                                                          |                                                                                                                                                                                                                                                                                                                                                                                                                                                                |
| 15.                                | Cultural based educate innovation for nutritional status (Citrakesumasari et al,2020)                                                                               | <b>Design:</b> Qualitative<br><b>Subject:</b> Informants are members of women's organizations, traditional leaders, community leaders, cadres, teenagers, presenters (MC) during Mappacci, and prospective brides and grooms.<br><b>Variables:</b> Local culture,culture-based education about nutrition for pregnant women, improving education.                                                                                                                                                        | <b>Results:</b> Modules that use local symbols and language are easier for women's organizations and community leaders to use in explaining information about nutritional anemia and CED to teenagers and prospective brides.<br><br>More prospective brides and grooms understand the signs of anemia and nutritional deficiencies in pregnant women and the importance of iron tablets for pregnant women.                                                   |
| 16.                                | Food taboo among pregnant Ethiopian women: magnitude, drivers, and association with anemia (Mohammed et al.,2019)                                                   | <b>Design:</b> Case Control<br><b>Subjects:</b> 592 pregnant women consisting of 187 pregnant women were anemic, 405 pregnant women were not anemic<br><b>Variables:</b> 1) Sociodemography, Taboo Foods, 2) Reproductive Health, 3) Health/Nutrition<br><b>Instrument:</b> Hb measurement with HemoCue Hb@201 (HemoCue AB, Ängelholm, Sweden), then divided into 2 groups: anemia and no anemia.<br><br><b>Analysis:</b> Bivariate Chi Square Analysis and Multiple Logistic Regression Analysis CI 95% | Results: (1) a small number of participants were still taboo when pregnant about one or several types of food. (2) Compliance with PRFT was 26.2 and 14.6% in anemic and normal individuals, respectively. Green chilies, offal, and processed dark green vegetables such as spinach, lettuce, kale, and broccoli are foods that should not be consumed. (3) It should not be eaten because what is given is mostly traditional beliefs and misunderstandings. |
| 17.                                | Maternal Dietary Intakes, Red Blood Cell Indices and Risk for Anemia in the First, Second and Third Trimesters of Pregnancy and at Predelivery (Agbozo et al, 2020) | <b>Design:</b> Prospective research<br><b>Subject:</b> 450 pregnant women<br><b>Variables:</b> Anthropometrics, HB levels at 4 examinations (trimester I, II, III when giving birth) Maternal food intake, Tools: Food Frequency<br><b>Questionnaire :</b> (FFQ), Maternal Anthropometry, Hb Level<br><b>Analysis:</b> Descriptive analysis, Pearson chi-squared test ( $\chi^2$ ), t-test. Bonferroni correction, McNemar test.                                                                         | <b>Result:</b><br>1. A higher likelihood of anemia is associated with a larger population with low food intake<br><br>2. Health education about nutrition, food diversity, and not just one type of food, food that contains nutrients, and iron tablets that are needed by pregnant women and vulnerable groups.                                                                                                                                              |
| 18.                                | Coresidence with mother-in-law and                                                                                                                                  | <b>Design:</b> Survey                                                                                                                                                                                                                                                                                                                                                                                                                                                                                    | <b>Results :</b>                                                                                                                                                                                                                                                                                                                                                                                                                                               |

| No. | Research Title,<br>Author, Year                                                                                                                                                    | Research Methods                                                                                                                                                                                                                                                                                                                                                                                                  | Research Result                                                                                                                                                                                                                                                                                                                                        |
|-----|------------------------------------------------------------------------------------------------------------------------------------------------------------------------------------|-------------------------------------------------------------------------------------------------------------------------------------------------------------------------------------------------------------------------------------------------------------------------------------------------------------------------------------------------------------------------------------------------------------------|--------------------------------------------------------------------------------------------------------------------------------------------------------------------------------------------------------------------------------------------------------------------------------------------------------------------------------------------------------|
|     | maternal anemia in rural India, (Rekha et al., 2019)                                                                                                                               | <b>Subject:</b> 124,835 women of childbearing age<br><b>Variables:</b> intake of iron tablets during pregnancy, experience of anemia and living with in-laws<br><b>Instrument:</b> Questionnaire<br><b>Analysis:</b> estimation strategies such as propensity score (PS) weighted regression and difference-in-differences type approaches with PS matching                                                       | Half of the participants cohabited with their mother-in-law, who can be a valuable resource during pregnancy. Moderate and severe anemia resolved in 13.2% when pregnant women who lived with their in-laws compared to those who did not live together.                                                                                               |
| 19. | Maternal hemoglobin and risk of low birth weight: A hospital-based cross-sectional study in Nepal, (Sah et al., 2022)                                                              | <b>Design:</b> Cross-Sectional<br><b>Subject:</b> 2418 full-term single pregnant women<br><b>Variables:</b> Demographic data, obstetric data, nutritional patterns, anthropometry, hemoglobin levels<br><b>Instruments:</b> Questionnaire, Hb examination, anthropometrics<br><b>Analysis:</b> Bivariate and multivariable logistic regression                                                                    | <b>Results :</b> Mothers with low hemoglobin levels have a higher risk of giving birth to small babies with abnormal birth weight compared to mothers with normal hemoglobin levels                                                                                                                                                                    |
| 20. | Exploring maternal nutrition counseling provided by health professionals during antenatal care follow-up: a qualitative study in Addis Ababa, Ethiopia-2019 (Alehegn et al., 2019) | <b>Design:</b> Qualitative, ground theory<br><b>Subject:</b> There are 2 managers, 9 professional healthcare workers, and 11 women who are currently in their third trimester of pregnancy.<br><b>Variables:</b> Observation of practical activities in the field by officers, and nutritional counseling activities for pregnant women<br><b>Instruments:</b> Questionnaire<br><b>Analysis:</b> Triangulate data | <b>Results :</b> Most participants complained that the nutritional information provided was insufficient and disregarded by most stakeholders. There is counseling about food restrictions and foods that can and cannot be eaten during pregnancy. Almost all respondents support the importance of providing nutrition counseling by a nutritionist. |

## Discussion

Food restrictions in Pakistan are grouped into hot foods, cold foods, and hard foods. The closest family, especially the shaman and in-laws, always reminds me. Pregnant women after 12 weeks of pregnancy or after the symptoms of nausea and vomiting

have passed are recommended to eat foods in the cold group because, in the early period of pregnancy, the body is in a hot state. On the other hand, when entering the third trimester at the end of pregnancy, pregnant women are advised to eat foods in the hot group because it accelerates delivery.

During pregnancy, mothers are not advised to consume hard foods, because it can cause the mother's stomach to bloat and disrupt the condition of the pregnancy (Asim et al., 2022).

Dietary restrictions on animal protein include meat, milk, eggs, and certain fish in Ethiopia and their effects on the mother and future baby (Amare et al, 2022; Workneh et al., 2023). Dark green vegetables such as kale, spinach, broccoli, and lettuce are the foods that are most avoided, as are green chilies, and offal (Mohammed et al., 2019). Pregnant women stated that food taboos in the Republic of Congo were specifically reminded by parents, especially fathers, mothers, and traditional elders and grandmothers who played an important role in regulating the food that pregnant women could consume (Maycondo et al, 2022).

Specifically in Ghana, apart from animal products that are taboo, mushrooms, vegetables, and red fruit are taboo for pregnant women (Dalaba et al, 2021). In contrast to Pakistan, Ethiopia, and Ghana, in Zulu, the detailed food assortment of animal products and vegetable

products also includes yellow vegetables and fruit. The impact that occurs on the mother, such as problems during pregnancy and childbirth and on the baby after birth, will experience pain and defects at birth.

The family helps pregnant women learn how to take care of themselves during pregnancy (Darmawati et al., 2022). Fathers, mothers, in-laws, and traditional leaders teach pregnant women to comply with existing cultural norms so that they are protected from various obstacles and dangers during pregnancy and childbirth (Maycondo et al., 2022). Amare et al, 2022 stated that in eastern Ethiopia half (48%) of pregnant women reported having dietary restrictions during pregnancy and having dietary restrictions during pregnancy. Sources of information were family (in-laws), neighbors, community, health workers, and television/radio (OR 3.58; 95%, CI 1.89, 6.83), more (39.2%) friends of pregnant women avoided food during pregnancy ( OR 1.91;95%, CI 1.22, 2.99)

The possibility of anemia occurring is 4.21 times greater in

pregnant women with a low variety of food types compared to pregnant women with a high variety of food types (Teshome et al., 2020). Agbozo et al (2020) confirmed that the risk of anemia increases 3-4 times during pregnancy. When surveyed, one-fifth of pregnant women reported avoiding certain foods due to cultural taboos (Muhammad et al, 2019). Food restrictions due to taboos are a predictor of anemia. Anemia is 3.9 times more common in pregnant women who observe restrictions due to cultural practices compared to pregnant women who consume various types of food without restrictions (Teshome et al, 2020).

Abstinence from food for a long time can cause Chronic Energy Deficiency (CED) due to a low intake of food containing protein, carbohydrates, fat, and iron (Anggraini et al, 2023). Pregnant women with low iron levels or hemoglobin have a higher risk of abnormal birth weight for their babies compared to women with normal hemoglobin levels (Sah et al, 2022).

All the research results above are about field facts about pregnant women's compliance with the culture

of abstinence from food and are strengthened by information from traditional leaders and supervision from fathers, mothers, mothers-in-law, and husbands as well as fears of the dangers that will be experienced by mothers and babies who will be born. Belief in culture cannot be easily eliminated, so interventions related to food taboos can be carried out with religious-based health counseling (Darmawati et al, 2020) because religious beliefs that fasting for pregnant women is a spiritual practice so as not to harm pregnancy (Workneh et al, 2023 ). Providing information about local food that contains iron (Darmawati et al., 2020) as well as health education based on local wisdom (Darmawati et al., 2022). Papandreou et al., 2023 stated that the group of pregnant women were more compliant ( $p < 0.01$ ) when given a local food diet in early pregnancy and experienced an increase in nutritional status. Anxiety and depression decreased among pregnant women who received local traditional food menus ( $p = 0.048$ ), compared to the control group.

Overcoming anemia in pregnant women with a cultural

approach turns out to get meaningful results, Darmawati et al, 2020, 2022; Papandrea et al., 2023; Nahrisah et al., 2020; Citrakesumasari et al, 2020 with intervention carried out for around 15 weeks. The use of picture books that were appropriate to the cultural context and local wisdom in the control group increased hemoglobin and hematocrit levels, increased knowledge, eating frequency scores, number of iron tablets intake, and total intake of other substances daily iron from food and the baby's birth weight (Nahrisah et al., 2020). Likewise, the use of modules with symbols and local language that are per local wisdom can increase the bride and groom's knowledge about the signs and risks of anemia, nutrition during pregnancy, and CED (Citrakesumasari et al., 2020).

Conflict of Interest: None

### References :

- Teshome, MS., Meskel, DH., Wondafrash,B. (2020). *Determinants of Anemia Among Pregnant Women Attending Antenatal Care Clinic at Public Health Facilities in Kacha Birra District, Southern Ethiopia*, Journal of Multidisciplinary Healthcare 2020:13 1007–1015, PMID: 33061406 PMCID: [PMC7522419](#) doi: [10.2147/JMDH.S259882](#)
- Muthuraj,LP., Kandasamy,S., Subbiah,P., Sibqathulla,MJ.,Velappan,LK., Gopal,M., Ramya,JE., Jayaraman,Y., and Kalyanaraman,S. (2023). *Sociocultural and drug-related factors associated with adherence to iron-folic acid supplementation among pregnant women*. J Educ Health Promot. 2023; 12: 121. doi: 10.4103/jehp.jehp\_1008\_22. eCollection 2023

### Conclusion

Food restrictions during pregnancy come from animal products and plant products. The culture of abstinence is supported by traditional elders and family, namely the father, mother, in-laws, and husband. Anemia and prolonged food intake can cause Chronic Energy Deficiency (CED) in mothers and babies with low birth weight. Interventions to prevent anemia can be carried out by providing health education using local cultural and religious approaches and providing food from local food sources.

### Acknowledgements:

We thank all the lecturers at Airlangga University and friends from Class Eight who have supported the writing of this article.

- Asim, M., Ahmed, ZH., Nichols, AR., Rickman,R., Neiterman,E., Mahmood,A., and Widen. EM. (2021). *What stops us from eating: a qualitative investigation of dietary barriers during pregnancy in Punjab, Pakistan*. Public Health Nutrition: 25(3), 760–769 doi:10.1017/S1368980021001737
- Mohammed, SH., Taye,H., Larijani, B., Esmailzadeh,A. (2019). *Food taboo among pregnant Ethiopian women: magnitude, drivers, and association with anemia*. Nutrition Journal 18, Article number: 19 (2019) <https://nutritionj.biomedcentral.com/articles/10.1186/s12937-019-0444> doi: [10.1186/s12937-019-0444-4](https://doi.org/10.1186/s12937-019-0444-4)
- Laisser,R., Woods,R., Bedwell,C., Kasengele,C., Nsemwa,L., Kimaro, D.,Kuzenza,F., Lyangenda,K., Shayo,H., Tuwele,K., Wakasiaka,S., Ringia,P., and Lavender,T., (2021). *The tipping point of antenatal engagement*. ScienceDirect Sexual & Reproductive Healthcare journal homepage: <https://doi.org/10.1016/j.srhc.2021.100673>
- Angraini ,DI., Sulastrri,D., Hardisman,H., and Yusrawati,Y., (2023). *Angraini Model as Effort to Early Detection of Chronic ergy Deficiency in Pregnancy*. KEMAS 19 (1) (2023) 102-112 Jurnal Kesehatan Masyarakat <http://journal.unnes.ac.id/nju/index.php/kemas> pISSN 1858-1196 eISSN 2355-3596
- Workneh, F., Tsegaye,S., Amanuel, H., Egllovitch, M., Shifraw, T., Shiferie, F., Tadesse,AW., Worku,A., Isanaka,S.,Lee,ACC.,Berhane, Y.2023. *Dietary Perspectives and Practices during Pregnancy in Rural Amhara Region of Ethiopia: An Exploratory Qualitative Study*.Current Developments in Nutrition. Volume 7, Issue 6, June 2023, 100079. <https://www.sciencedirect.com/science/article/pii/S2475299123212524>
- Dalaba, MA., Nonterah,EA., Chatio, ST., Adoctor, JK., Watson, D., Barker, M., Ward, KA., Debpuur, C (2021). *Culture and community perceptions on diet for maternal and child health: a qualitative study in rural northern Ghana*. BMC Nutrition volume 7, Article number: 36 <https://bmcnutr.biomedcentral.com/articles/10.1186/s40795-021-00439-x>
- Alehegn,MA., Fanta,TK., and Ayalew,AF. (2019). *Exploring maternal nutrition counseling provided by health professionals during antenatal care follow-up: a qualitative study in Addis Ababa, Ethiopia-2019*. BMC Nutrition 7:20 <https://doi.org/10.1186/s40795-021-00427-1>
- Darmawati Darmawati.,Siregar,TN., Hajjul,K.,Tahlil,T.,(2020). *Exploring Indonesian mothers' perspectives on anemia during pregnancy*. Enferm Clin (Engl Ed) 2020 Dec 28:S1130-8621(20)30551-9. doi: [10.1016/j.enfcli.2020.11.002](https://doi.org/10.1016/j.enfcli.2020.11.002)
- Darmawati Darmawati.,Siregar,TN., Hajjul,K.,Tahlil,T.,(2020). *Acehnese Cultural Leaders' Perspective on Anemia in Pregnant Women*. Hindawi Advances in Public Health., Article ID 8710254, 6 pages <https://doi.org/10.1155/2020/8710254>
- Darmawati Darmawati.,Siregar,TN., Hajjul,K.,Husna,C.,(2022). *Husband's Perception on Anemia among Pregnant Women based on Cultural Perspective: A Qualitative Study*. Macedonia Journal Of Medical Sciences . Vol. 10 No. G (2022):Nursing



- doi: <https://doi.org/10.3889/oamjms.2022.7617>
- Maykondo,BK., Horwood , C.,Haskins ,L., Mapumulo ,L.,MA. Kilola ,BM., Mokanisa ,MB., Hatloy ,A., John ,VM., Bitadi,PMB. (2022).A qualitative study to explore dietary knowledge,beliefs, and practices among pregnant women in a rural health zone in the Democratic Republic of Congo. *Journal of Health, Population and Nutrition* <https://doi.org/10.1186/s41043-022-00333-7>
- Amare, E., Tura, AK.,Semahegn, A.,and Teji Roba.,KT. *Food taboos among pregnant women and associated factors in eastern Ethiopia* (2022).SAGE Open Medicine Volume 10: 1–11.sagepub.com/journals-permissions DOI: 10.1177/20503121221133935
- Ramulondi, M.,Wet , H., and Rosemary Ntul, NR. *Traditional food taboos and practices during pregnancy, postpartum recovery, and infant care of Zulu women in northern KwaZulu-Nata* (2021). *Journal of Ethnobiology and Ethnomedicine* 17:15 <https://doi.org/10.1186/s13002-021-00451-2>
- Rekha V., Manan R., (2019) *Coresidence with mother-in-law and maternal anemia in rural India. Social Science & Medicine Volume 226 April 2019 Pages 37-46.* <https://www.sciencedirect.com/science/article/abs/pii/S0277953619300942>
- Agbozo.F.,Abubakari.A., Der, J., Jahn.( 2020).*Maternal Dietary Intakes, Red Blood Cell Indices and Risk for Anemia in the First, Second and Third Trimesters of Pregnancy and at Predelivery. Nutrients , 12(3), 777;* <https://www.mdpi.com/2072-6643/12/3/777>
- Sah ,SK.,Sunuwar, DR., Baral,JR., Singh,DR., Chaudhary, NK., Gurung, G., (2022) . *Maternal hemoglobin and risk of low birth weight: A hospital-based cross-sectional study in Nepal.Heliyon. Volume 8, Issue 12, December 2022, e12174.* <https://www.sciencedirect.com/science/article/pii/S2405844022034624>
- Citrakesumasari, Dwi,S.,Suriah, Bohari, Mesra.R.(2020). *Culture-based educate innovation for nutritional status. Enfermería Clínica Volume 30, Supplement 4, June 2020, Pages 9-12.* <https://doi.org/10.1016/j.enfcli.2019.10.032>
- Nahrisah, P., Somrongthong, R., Viriyautsahakul, N., Viwattanakulvanid, P., and Plianbangchang,S. (2020). *Effect of Integrated Pictorial Handbook Education and Counseling on Improving Anemia Status, Knowledge, Food Intake, and Iron Tablet Compliance Among Anemic Pregnant Women in Indonesia. J Multidiscip Healthc. 2020; 13: 43–52. Published online 2020 Jan 15. doi: 10.2147/JMDH.S213550*
- Papandreou, P.,Vezou, C.,Giouxari,A., Kaliora, AC., Skouroliakou. (2023) *Improving Adherence to the Mediterranean Diet in Early Pregnancy Using a Clinical Decision Support System (CDSS) ; A Randomised Controlled Clinical Trial. Nutrients. 2023 Jan; 15(2): 432. Published online 2023 Jan 14. doi: 10.3390/nu15020432. PMID: 3667830. PMCID: PMC9866975* <https://www.ncbi.nlm.nih.gov/pmc/articles/PMC9866975/>
